# Supplementary material for: Effect of C3-Alcohol Impurities on Alumina-Catalyzed Bioethanol Dehydration to Ethylene: Experimental Study and Reactor Modeling
Source: MDPI journal article supplement (doi:10.3390/catal13030509), 2023-03-01
Supplement: s1 [file s1]

# Supplementary Materials

## Effect of C3-Alcohols Impurities on Alumina-Catalyzed Dehydration of Bioethanol to Ethylene. Experimental Study and Reactor Modeling

Elena Ovchinnikova<sup>1</sup>, Sardana Banzaraktsaeva, Maria Kovgan, Victor Chumachenko

*Boriskov Institute of Catalysis, Siberian Branch of the Russian Academy of Sciences;  
Pr. Akad. Lavrentieva, 5, Novosibirsk, 630090 Russia*

### Table of Contents

|                                       |    |
|---------------------------------------|----|
|                                       | P. |
| Figure S1.                            | S2 |
| Figure S2.                            | S3 |
| Mathematical model of tubular reactor | S3 |
| References                            | S4 |

---

<sup>1</sup> Corresponding Author: Ovchinnikova E.V.; Email: evo@catalysis.ru; ph.: +73833269412

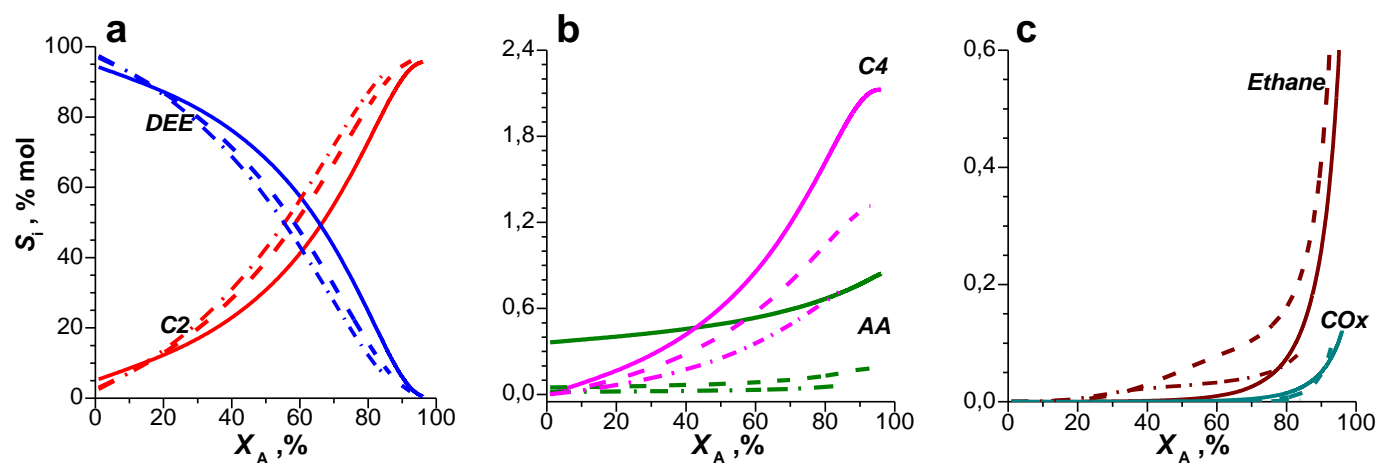

**Figure S1.** The calculated selectivity to C2 and DEE (a), C4 and AA (b), ethane and COx (c), vs. ethanol conversion  $X_A$  in PFR.

Conditions: 400°C, 0.726 g catalyst, 21.05 g/h solution of 92%wt EtOH and C3-alcohol impurities of 0.001 (solid), 0.15 (dash) and 0.3%mol (dash-dot).

## Mathematical model of tubular reactor

Quasi-homogeneous 2D model [34, 35] describes heat and mass transfer in axial and radial directions. This model also takes into account the changes of effective radial conductivity value  $\lambda_R$  from the conductivity in the core bed to the gas phase conductivity in the wall region [36]. For a more accurate representation of hydrodynamic and exchange processes when reacting gas flows through the layer of particles of complex geometric shapes, this model takes into account the different interstitial gas velocities around the particles ( $u_{out}$ ) and inside their holes ( $u_{hole}$ ) (Figure S2). The model adequately describes behavior of a multitubular fixed-bed reactor (MTR) and appropriately predicts the performance of heterogeneous catalytic processes [25, 34-35, 37, 38-40]. The MTR simulation assumes that all the wall-heated tubes were identical in behavior.

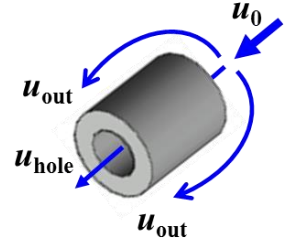

Figure S2. A sketch of "gas flow sharing" in a holed cylinder

Quasi-homogeneous 2D model of a wall-heated tubular reactor [25,34] accounts for material and heat transfer in radial and axial directions of tube with fixed-bed catalyst:

$$\begin{aligned} \frac{P_0}{RT_0} \frac{\partial(\bar{u}_l y_i)}{\partial l} + \frac{1}{r} \frac{P_0}{RT_0} \frac{\partial}{\partial r} (r \bar{u}_r y_i) - \frac{1}{r} \frac{\partial}{\partial r} \left( r \frac{P}{RT} D_R \frac{\partial y_i}{\partial r} \right) &= - \sum_j^9 (1 - \varepsilon) \xi_{ij} \varpi_j ; i = \overline{1,11} ; \\ \frac{P_0}{RT_0} \bar{u}_l c_p \frac{\partial T}{\partial l} + \frac{P_0}{RT_0} \bar{u}_r c_p \frac{\partial T}{\partial r} - \sum_i c_{pi} \left( \frac{\partial T}{\partial r} \right) \frac{P}{RT} D_R \frac{\partial y_i}{\partial r} - \frac{1}{r} \frac{\partial}{\partial r} \left( r \lambda_R \frac{\partial T}{\partial r} \right) &= - (1 - \varepsilon) \sum_j^9 \Delta H_j \varpi_j ; \end{aligned} \quad (S1)$$

Here

$l$  and  $r$  are tube length and radius coordinates, respectively;

$y_i$  is molar fraction of  $i^{\text{th}}$  component;

$\xi_{ij}$  is stoichiometric coefficient of  $i^{\text{th}}$  component in  $j^{\text{th}}$  reaction;

$\varpi_j$  is apparent rate of  $j^{\text{th}}$  reaction in a catalyst grain,

$\varepsilon$  is a bed void fraction,

$\varepsilon = \varepsilon_{bed} + \varepsilon_{hole}(1 - \varepsilon_{bed})$ ;

$\varepsilon_{bed}$  is a void fraction for solid pellets,

$\varepsilon_{bed} = 0.36 + 0.1 d_{eq.sph} / ID + 0.7 (d_{eq.sph} / ID)^2$ ;

$\varepsilon_{hole}$  is a void fraction of a single pellet,  $\varepsilon_{hole} = \frac{N_{hole}}{D}$ ;

$d_{eq.sph}$  is diameter of equivalent-volume sphere,  $d_{eq.sph} = D \sqrt[3]{1.5 h / D}$ ;

$ID$  is inner tube diameter;

$D$  is outer diameter of the pellet;

$h$  is height of the pellet;

$D_{Ri}$  is effective radial diffusivity;

$$D_{Ri} = D_{Ri}^0 + \frac{\nu}{K} [\varepsilon_{bed} Re_{out} + \varepsilon_{hole}(1 - \varepsilon_{bed}) Re_{hole}], K = \frac{8}{1.78} \left[ 2 - \left( 1 - \frac{2}{\frac{ID}{d_{eq.sph}}} \right)^2 \right]; \quad (S2)$$

$\nu$  is gas viscosity,  $m^2/s$ ;

$\Delta H_j$  is enthalpy of  $j^{\text{th}}$  reaction;

$\lambda_R$  is effective radial thermal conductivity in a fixed bed defined as a sum of conductivity without flow and convective constituent

$$\lambda_R^{conv}, \lambda_R^{conv} = \frac{\lambda_{gas}}{K} [\varepsilon_{bed} Re_{out} + \varepsilon_{hole}(1 - \varepsilon_{bed}) Re_{hole}] Pr ; \quad (S3)$$

$Pr$  is Prandtl number;

$Re_{out}$  and  $Re_{hole}$  are Reynolds numbers expressed in terms of corresponding velocities and mixing length,

$Re_{out} = d_{eq.sph} u_{out} / \nu$ ,

$Re_{out} = d_{hole} u_{hole} / \nu$ ,

$d_{hole} = 2(\cos \theta)h$ ;

$c_p$  is total gas heat capacity;

$P$  is pressure;

$P_0$  is pressure under normal conditions;

$R$  is universal gas constant;

$T$  is temperature;

$T_0$  is temperature under normal conditions;

$u_l$  is superficial axial gas velocity;

$\bar{u}_l$  is superficial axial gas velocities at standard temperature and pressure (STP);

$\bar{u}_r$  is radial gas velocities at STP;

$$\frac{\partial \bar{u}_l}{\partial l} = \frac{2RT_0}{\frac{ID^2}{4} P_0} \int_0^{\frac{ID}{2}} \sum_i \sum_j^9 r (1 - \varepsilon) \xi_{ij} \varpi_j dr ; \quad (S4)$$

$$\overline{u_r} = -\frac{RT}{P_0 r} \int_r^{\frac{ID}{2}} (1 - \varepsilon) r \sum_i \sum_j^9 \xi_{ij} \omega_j dr + \frac{1}{r} \frac{\partial \overline{u_l}}{\partial l} \left( \frac{ID^2}{4} - \frac{r^2}{2} \right);$$

Boundary conditions:

$$\begin{aligned} 0 \leq r \leq \frac{ID}{2} \quad l = 0 : \overline{u_l}(0, r) = \overline{u_0}, \quad T(0, r) = T_{in}, \quad y_i(0, r) = y_{in}, \quad i = \overline{1, 11}; \\ 0 \leq l \leq L \quad r = 0 : \frac{\partial y_i(l, 0)}{\partial r} = 0, \quad \frac{\partial T(l, 0)}{\partial r} = 0; \\ r = \frac{ID}{2} : \frac{dy_i(l, ID/2)}{dr} = 0, \quad i = \overline{1, 11}; \quad \overline{u_r}(l, ID/2) = 0; \quad \lambda_R \frac{\partial T}{\partial r} = \alpha (T_w - T); \end{aligned} \quad (S5)$$

Here

$y_{i in}$  is an inlet molar fraction of  $i^{th}$  component;

$\overline{u_0}$  is superficial inlet gas velocity at STP;

$L$  is tube length;

$T_w$  is tube wall temperature;

$\alpha$  is wall heat transfer coefficient,

$$\alpha = \frac{\lambda_R}{D_{H.EQ} [\ln(\lambda_R/\lambda_{gas}) - 1]};$$

$D_{H.EQ}$  is equivalent diameter of a pore channel;

A dusty gas model described diffusion in a porous isothermal particle:

$$\frac{\partial}{\partial \rho} \left( D_{ri}^* \frac{\partial C_i}{\partial \rho} \right) - \frac{RT}{P} \frac{\partial}{\partial \rho} (V_i^* C_i) = \sum_{j=1}^9 \xi_{ij} \omega_j, \quad i = \overline{1, 11}; \quad (S6)$$

Boundary conditions:

$$\begin{aligned} \rho = 0 : \quad \frac{\partial C_i}{\partial \rho} = 0, \quad i = \overline{1, 11}; \\ \rho = \rho_{grain} : \quad C_i^{surf} = 0, \quad i = \overline{1, 12}; \end{aligned} \quad (S7)$$

Here

$D_{ri}^*$  is a generalized diffusivity coefficient or Wilke diffusion coefficient of  $i^{th}$  component;

$V_i^*$  is so-called hydrodynamic velocity of  $i^{th}$  component [34, 41];

$C_i$  is molar concentration of  $i^{th}$  component;

$C_i^{surf}$  is concentration of the  $i^{th}$  component on the surface

$$\omega_j = \frac{1}{\rho_{grain}} \int_0^{\rho_{grain}} \omega_j(\rho) d\rho;$$

$\rho_{grain}$  is an equivalent particle size, that is the ratio of the pellet geometric volume to the pellet external geometric surface area;

$\omega_j$  is a rate of  $j^{th}$  reaction under kinetics controlled conditions.

The Wilke diffusion coefficient  $D_{ri}^*$  and hydrodynamic velocity  $V_i^*$  [34, 41] depend on the effective binary diffusion coefficient  $D_{ik}^* = \Pi D_{ik}$  and on the effective Knudsen diffusion coefficient  $D_{ik}^{*kn} = \Pi D_{ik}^{kn}$ , where  $D_{ik}$  is binary diffusion coefficient,  $D_{ik}^{kn}$  is Knudsen diffusion coefficient,  $\Pi$  is the empirical permeability coefficient;  $\Pi$  accounts for the physical behavior of the porous structure.

Pressure drop per the bed length unit, that is, specific hydraulic resistance  $\Delta P/L$  was calculated for the catalyst of arbitrary shape according to the approach set forth in [34, 36]:

$$\begin{cases} u_l = \varepsilon_{bed} u_{out} + (1 - \varepsilon_{bed}) \varepsilon_{hole} u_{hole} \\ g_1 u_{hole} + g_2 u_{hole}^2 = \frac{\Delta P}{\langle \cos \theta \rangle h} = f_1 u_{out} + f_2 u_{out}^2 \end{cases} \quad (S8)$$

Here

$\Delta P$  is the pressure drop over the distance  $\langle \cos \theta \rangle h$ ;

$$g_1 = \frac{16\pi\mu}{d^2}; \quad g_2 = \frac{1.75\pi\rho_{gas}}{4h} \left( 1 - \frac{\varepsilon_{hole}}{N_{hole}} \right);$$

$$f_1 = \frac{150\mu}{d_{eq.sph}^2} \left( \frac{1 - \varepsilon_{bed}}{\varepsilon_{bed}} \right)^2; \quad f_2 = \frac{1.75\rho_{gas}}{d_{eq.sph}} \frac{1 - \varepsilon_{bed}}{\varepsilon_{bed}};$$

$d$  is inner diameter of the pellet;

$\mu$  is gas viscosity,

$N_{hole}$  is holes number;

$\rho_{gas}$  is gas density.

Analytic expression which provides to determine pressure gradient in the bed was published in [37].

## References

25. Kagyrmanova A.P., Chumachenko V.A., Korotkikh V.N., Kashkin V.N., Noskov A.S. Catalytic dehydration of bioethanol to ethylene: Pilot-scale studies and process simulation. Chemical Engineering Journal 2011, 176-177, 188-194. <https://doi.org/10.1016/j.cej.2011.06.049>

34. Kagyrmanova A.P., Zolotarskii I.A., Vernikovskaya N.V., Smirnov E.I., Kuzmin V.A., Chumakova N.A. Modeling of steam reforming of natural gas with shaped catalyst. *Theoretical Foundations of Chemical Engineering* **2006**, 40, 155-167. <https://doi.org/10.1134/S0040579506020084>
35. Kagyrmanova A.P., Zolotarskii I.A., Smirnov E.I., Vernikovskaya N.V. Optimum Dimensions of Shaped Steam Reforming Catalysts. *Chemical Engineering Journal* 2007, 134, 228-234. <https://doi.org/10.1016/j.cej.2007.03.035>
36. Smirnov E.I., Muzykantov A.V., Kuzmin V.A., Kronberg A.E., Zolotarskii I.A. Radial heat transfer in packed beds of spheres, cylinders and Rashig rings Verification of model with a linear variation of  $\lambda_{er}$  in the vicinity of the wall. *Chemical Engineering Journal* **2003**, 91, 243-248. [https://doi.org/10.1016/S1385-8947\(02\)00160-2](https://doi.org/10.1016/S1385-8947(02)00160-2)
37. Zolotarskii I.A., Voennov L.I., Zudilina L.Y., Isupova L.A., Zotov R.A., Medvedev D.A., Stepanov D.A., Livanova A.V., Meshcheryakov E.P., Kurzina I.A. Theoretical Optimization of the Shape and Size of Adsorbent Grains for Associated Petroleum Gas Drying. *Catalysis in Industry* **2018**, 10, 49-56. <https://doi.org/10.1134/S2070050418010129>
38. Ovchinnikova E.V., Vernikovskaya N.V., Andrushkevich T.V., Chumachenko V.A. Mathematical modeling of  $\beta$ -picoline oxidation to nicotinic acid in multitubular reactor: Effect of the gas recycle. *Chemical Engineering Journal* **2011**, 176-177, 114-123. <https://doi.org/10.1016/j.cej.2011.06.047>
39. Ovchinnikova E.V., Chumachenko V.A., Valuiskikh N.N. Influence of the process parameters on temperature conditions and productivity of multitubular reactor for methanol to formaldehyde oxidation. *Catalysis in Industry*. **2013**, 5(4), 297-311. <https://doi.org/10.1134/S2070050413040077>
40. Ovchinnikova E.V., Chumachenko V.A. Nicotinic acid synthesis at elevated  $\beta$ -picoline load: Exploring the possibility to intensify the process. *Chemical Engineering Research and Design* **2021**, 171, 63-72. <https://doi.org/10.1016/j.cherd.2021.04.028>
41. Frank-Kamenetskii D.A. Diffuziya i teploperedacha v khimicheskoi kinetike (*Diffusion and Heat Transfer in Chemical Kinetics*), Moscow: Nauka, **1987**.
